# Supplementary material for: Effect of Whey Protein Supplementation in Postmenopausal Women: A Systematic Review and Meta-Analysis
Source: MDPI journal article supplement (doi:10.3390/nu14194210), 2022-10-10

## **Supporting information**

**Supplemental Method S1.** The full search strings: example of PubMed

**Supplemental Table S1.** PRISMA 2020 checklist

**Supplemental Table S2.** Differences in muscle strength between whey protein supplements and control supplements considering the subgroup analysis of RT/non-RT

**Supplemental Table S3.** Differences in muscle mass between whey protein supplements and control supplements considering the subgroup analysis of RT/non-RT

**Supplemental Table S4.** Differences in fat mass and body weight between whey protein supplements and control supplements considering the subgroup analysis of RT/non-RT

**Supplemental Table S5.** Differences in daily nutrients intake between whey protein supplements and control supplements considering the subgroup analysis of RT/non-RT

**Supplemental Figure S1.** Forest plot of the grip strength

**Supplemental Figure S2.** Forest plot of the biceps curl strength

**Supplemental Figure S3.** Forest plot of the knee extension strength

**Supplemental Figure S4.** Forest plot of the knee flexion strength

**Supplemental Figure S5.** Forest plot of the gait speed

**Supplemental Figure S6.** Forest plot of the chest press

**Supplemental Figure S7.** Forest plot of the rising from sitting position

**Supplemental Figure S8.** Forest plot of the upper limb lean mass

**Supplemental Figure S9.** Forest plot of the lower limb lean mass

**Supplemental Figure S10.** Forest plot of the skeletal muscle mass

**Supplemental Figure S11.** Forest plot of the fat mass

**Supplemental Figure S12.** Forest plot of the body weight

**Supplemental Figure S13.** Forest plot of the total energy intake

**Supplemental Figure S14.** Forest plot of the carbohydrate intake

**Supplemental Figure S15.** Forest plot of the fat intake

**Supplemental Figure S16.** Forest plot of the protein intake

**Supplemental Method S1.** The full search strings: example of PubMed

| Search terms                                                                                                                                  | Number |
|-----------------------------------------------------------------------------------------------------------------------------------------------|--------|
| #1 "whey protein "[MeSH Terms] OR " whey protein "[All Fields]                                                                                | 4610   |
| #2 (" menopause women "[MeSH Terms] OR " menopause women<br>"[All Fields]) OR ("older women "[ MeSH Terms] OR " older women<br>"[All Fields]) | 16574  |
| #3 #1 AND #2                                                                                                                                  | 23     |

**Supplemental Table S1. PRISMA 2020 checklist**

| <b>Section and Topic</b> | <b>Item #</b> | <b>Checklist item</b>                                                                                                                                                                                                                                                            | <b>Location where item is reported</b> |
|--------------------------|---------------|----------------------------------------------------------------------------------------------------------------------------------------------------------------------------------------------------------------------------------------------------------------------------------|----------------------------------------|
| <b>TITLE</b>             |               |                                                                                                                                                                                                                                                                                  |                                        |
| Title                    | 1             | Identify the report as a systematic review.                                                                                                                                                                                                                                      | 1                                      |
| <b>ABSTRACT</b>          |               |                                                                                                                                                                                                                                                                                  |                                        |
| Abstract                 | 2             | See the PRISMA 2020 for Abstracts checklist.                                                                                                                                                                                                                                     | 1                                      |
| <b>INTRODUCTION</b>      |               |                                                                                                                                                                                                                                                                                  |                                        |
| Rationale                | 3             | Describe the rationale for the review in the context of existing knowledge.                                                                                                                                                                                                      | 1-2                                    |
| Objectives               | 4             | Provide an explicit statement of the objective(s) or question(s) the review addresses.                                                                                                                                                                                           | 2                                      |
| <b>METHODS</b>           |               |                                                                                                                                                                                                                                                                                  |                                        |
| Eligibility criteria     | 5             | Specify the inclusion and exclusion criteria for the review and how studies were grouped for the syntheses.                                                                                                                                                                      | 3                                      |
| Information sources      | 6             | Specify all databases, registers, websites, organizations, reference lists and other sources searched or consulted to identify studies. Specify the date when each source was last searched or consulted.                                                                        | 2-3                                    |
| Search strategy          | 7             | Present the full search strategies for all databases, registers, and websites, including any filters and limits used.                                                                                                                                                            | 2-3<br>Supplemental Method 1           |
| Selection process        | 8             | Specify the methods used to decide whether a study met the inclusion criteria of the review, including how many reviewers screened each record and each report retrieved, whether they worked independently, and if applicable, details of automation tools used in the process. | 3                                      |

| Section and Topic             | Item # | Checklist item                                                                                                                                                                                                                                                                                       | Location where item is reported |
|-------------------------------|--------|------------------------------------------------------------------------------------------------------------------------------------------------------------------------------------------------------------------------------------------------------------------------------------------------------|---------------------------------|
| Data collection process       | 9      | Specify the methods used to collect data from reports, including how many reviewers collected data from each report, whether they worked independently, any processes for obtaining or confirming data from study investigators, and if applicable, details of automation tools used in the process. | 3                               |
| Data items                    | 10a    | List and define all outcomes for which data were sought. Specify whether all results that were compatible with each outcome domain in each study were sought (e.g. for all measures, time points, analyses), and if not, the methods used to decide which results to collect.                        | 3                               |
|                               | 10b    | List and define all other variables for which data were sought (e.g. participant and intervention characteristics, funding sources). Describe any assumptions made about any missing or unclear information.                                                                                         | 3                               |
| Study risk of bias assessment | 11     | Specify the methods used to assess risk of bias in the included studies, including details of the tool(s) used, how many reviewers assessed each study and whether they worked independently, and if applicable, details of automation tools used in the process.                                    | 3                               |
| Effect measures               | 12     | Specify for each outcome the effect measure(s) (e.g. risk ratio, mean difference) used in the synthesis or presentation of results.                                                                                                                                                                  | 3                               |
| Synthesis methods             | 13a    | Describe the processes used to decide which studies were eligible for each synthesis (e.g. tabulating the study intervention characteristics and comparing against the planned groups for each synthesis (item #5)).                                                                                 | 3                               |
|                               | 13b    | Describe any methods required to prepare the data for presentation or synthesis, such as handling of missing summary statistics, or data conversions.                                                                                                                                                | 3                               |
|                               | 13c    | Describe any methods used to tabulate or visually display results of individual studies and syntheses.                                                                                                                                                                                               | 3                               |
|                               | 13d    | Describe any methods used to synthesize results and provide a rationale for the choice(s). If meta-analysis was performed, describe the model(s), method(s) to identify the presence and extent of statistical heterogeneity, and software package(s) used.                                          | 3                               |
|                               | 13e    | Describe any methods used to explore possible causes of heterogeneity among study results (e.g. subgroup analysis, meta-regression).                                                                                                                                                                 | 3                               |

| Section and Topic             | Item # | Checklist item                                                                                                                                                                                                                   | Location where item is reported    |
|-------------------------------|--------|----------------------------------------------------------------------------------------------------------------------------------------------------------------------------------------------------------------------------------|------------------------------------|
|                               | 13f    | Describe any sensitivity analyses conducted to assess robustness of the synthesized results.                                                                                                                                     | 3                                  |
| Reporting bias assessment     | 14     | Describe any methods used to assess risk of bias due to missing results in a synthesis (arising from reporting biases).                                                                                                          | 3                                  |
| Certainty assessment          | 15     | Describe any methods used to assess certainty (or confidence) in the body of evidence for an outcome.                                                                                                                            | 3                                  |
| <b>RESULTS</b>                |        |                                                                                                                                                                                                                                  |                                    |
| Study selection               | 16a    | Describe the results of the search and selection process, from the number of records identified in the search to the number of studies included in the review, ideally using a flow diagram.                                     | 4, Figure 1                        |
|                               | 16b    | Cite studies that might appear to meet the inclusion criteria, but which were excluded, and explain why they were excluded.                                                                                                      | 4-5                                |
| Study characteristics         | 17     | Cite each included study and present its characteristics.                                                                                                                                                                        | 4-6,<br>Table 1                    |
| Risk of bias in studies       | 18     | Present assessments of risk of bias for each included study.                                                                                                                                                                     | 7, Figure 2                        |
| Results of individual studies | 19     | For all outcomes, present, for each study: (a) summary statistics for each group (where appropriate) and (b) an effect estimate and its precision (e.g. confidence/credible interval), ideally using structured tables or plots. | 8-9,<br>Supplemental<br>Tables 2–5 |
| Results of syntheses          | 20a    | For each synthesis, briefly summaries the characteristics and risk of bias among contributing studies.                                                                                                                           | 7-10                               |
|                               | 20b    | Present results of all statistical syntheses conducted. If meta-analysis was done, present for each the summary estimate and its precision (e.g.                                                                                 | 7-10,                              |

| Section and Topic         | Item # | Checklist item                                                                                                                                 | Location where item is reported   |
|---------------------------|--------|------------------------------------------------------------------------------------------------------------------------------------------------|-----------------------------------|
|                           |        | confidence/credible interval) and measures of statistical heterogeneity. If comparing groups, describe the direction of the effect.            | Supplemental Figure 1-16, Table 2 |
|                           | 20c    | Present results of all investigations of possible causes of heterogeneity among study results.                                                 | N/A                               |
|                           | 20d    | Present results of all sensitivity analyses conducted to assess the robustness of the synthesized results.                                     | N/A                               |
| Reporting biases          | 21     | Present assessments of risk of bias due to missing results (arising from reporting biases) for each synthesis assessed.                        | N/A                               |
| Certainty of evidence     | 22     | Present assessments of certainty (or confidence) in the body of evidence for each outcome assessed.                                            | 10, Table 3                       |
| <b>DISCUSSION</b>         |        |                                                                                                                                                |                                   |
| Discussion                | 23a    | Provide a general interpretation of the results in the context of other evidence.                                                              | 10-12                             |
|                           | 23b    | Discuss any limitations of the evidence included in the review.                                                                                | 12                                |
|                           | 23c    | Discuss any limitations of the review processes used.                                                                                          | 12                                |
|                           | 23d    | Discuss implications of the results for practice, policy, and future research.                                                                 | 12                                |
| <b>OTHER INFORMATION</b>  |        |                                                                                                                                                |                                   |
| Registration and protocol | 24a    | Provide registration information for the review, including register name and registration number, or state that the review was not registered. | 2                                 |
|                           | 24b    | Indicate where the review protocol can be accessed, or state that a protocol was not prepared.                                                 | 2                                 |
|                           | 24c    | Describe and explain any amendments to information provided at registration or in the protocol.                                                | N/A                               |
| Support                   | 25     | Describe sources of financial or non-financial support for the review, and the role of the funders or sponsors in the review.                  | N/A                               |

| Section and Topic                              | Item # | Checklist item                                                                                                                                                                                                                             | Location where item is reported |
|------------------------------------------------|--------|--------------------------------------------------------------------------------------------------------------------------------------------------------------------------------------------------------------------------------------------|---------------------------------|
| Competing interests                            | 26     | Declare any competing interests of review authors.                                                                                                                                                                                         | N/A                             |
| Availability of data, code and other materials | 27     | Report which of the following are publicly available and where they can be found: template data collection forms; data extracted from included studies; data used for all analyses; analytic code; any other materials used in the review. | N/A                             |



**Supplemental Table S2.** Differences in muscle strength between whey protein supplements and control supplements considering the subgroup analysis of RT/non-RT

| Grip strength (kg)         |       |                    |       |       |               |       |                                 |
|----------------------------|-------|--------------------|-------|-------|---------------|-------|---------------------------------|
| Study                      | Mean  | Whey protein<br>SD | Total | Mean  | Control<br>SD | Total | Std diff in<br>means and 95% CI |
| <b>With RT</b>             |       |                    |       |       |               |       |                                 |
| Mori 2018 [24]             | 1.2   | 1.45               | 25    | 0.6   | 1.74          | 25    | 0.3745 [-0.185, 0.934]          |
| Kirk 2020 [23]             | 3.8   | 8.02               | 13    | 2.7   | 4.3           | 12    | 0.169 [-0.617, 0.955]           |
| Ashley 2021 [25]           | 2.249 | 4.95               | 28    | 2.11  | 4.48          | 39    | 0.0295 [-0.456, 0.515]          |
| <b>Without RT</b>          |       |                    |       |       |               |       |                                 |
| Kirk 2020 [23]             | 0.4   | 4.45               | 9     | 0.5   | 4.26          | 18    | -0.023 [-0.823, 0.777]          |
| Zhu 2015 [34]              | -0.87 | 3.98               | 99    | -1.11 | 3.88          | 94    | 0.061 [-0.221, 0.343]           |
| Knee flexion strength (kg) |       |                    |       |       |               |       |                                 |
| Study                      | Mean  | Whey protein<br>SD | Total | Mean  | Control<br>SD | Total | Std diff in<br>means and 95% CI |
| <b>With RT</b>             |       |                    |       |       |               |       |                                 |
| Weisgarber 2014 [35]       | -1.7  | 10.41              | 10    | 1     | 10.61         | 10    | -0.257 [-1.137, 0.623]          |
| Kirk 2020 [23]             | 52    | 39.2               | 13    | -1    | 85.1          | 12    | 0.8115 [-0.005, 1.628]          |
| <b>Without RT</b>          |       |                    |       |       |               |       |                                 |
| Kirk 2020 [23]             | -9    | 128                | 9     | -3    | 44.2          | 18    | -0.074 [-0.874, 0.726]          |
| Zhu 2015 [34]              | 1.81  | 3.78               | 99    | 1.65  | 3.98          | 94    | 0.0415 [-0.241, 0.324]          |

Supplemental Table S2. Cont.

| Chess press (kg)          |       |                    |       |        |               |       |                                 |
|---------------------------|-------|--------------------|-------|--------|---------------|-------|---------------------------------|
| Study                     | Mean  | Whey protein<br>SD | Total | Mean   | Control<br>SD | Total | Std diff in<br>means and 95% CI |
| <b>With RT</b>            |       |                    |       |        |               |       |                                 |
| Nabuco 2018 [31]          | 3     | 9.54               | 21    | 2      | 8             | 23    | 0.114 [-0.478, 0.706]           |
| Ashley 2021 [25]          | 5.106 | 5.298              | 28    | 4.57   | 5.05          | 39    | 0.104 [-0.382, 0.590]           |
| Gait speed test (m/s)     |       |                    |       |        |               |       |                                 |
| Study                     | Mean  | Whey protein<br>SD | Total | Mean   | Control<br>SD | Total | Std diff in<br>means and 95% CI |
| <b>With RT</b>            |       |                    |       |        |               |       |                                 |
| Mori 2018 [24]            | 0     | 0.1                | 25    | 0      | 0.173         | 25    | 0 [-0.554, 0.554]               |
| Nabuco 2018 [31]          | 0.194 | 0.213              | 21    | 0.0735 | 0.161         | 23    | 0.6425 [0.036, 1.249]           |
| Ashley 2021 [25]          | 1.575 | 3.64               | 28    | 1.8037 | 2.83          | 39    | -0.0715 [-0.557, 0.414]         |
| Biceps curl strength (kg) |       |                    |       |        |               |       |                                 |
| Study                     | Mean  | Whey protein<br>SD | Total | Mean   | Control<br>SD | Total | Std diff in<br>means and 95% CI |
| <b>With RT</b>            |       |                    |       |        |               |       |                                 |
| Weisgarber 2014 [35]      | 5.8   | 4.55               | 10    | 3.5    | 4.26          | 10    | 0.522 [-0.369, 1.413]           |
| Nabuco 2018 [31]          | 3     | 1.6                | 21    | 2      | 1.01          | 23    | 0.755 [0.143, 1.367]            |

**Supplemental Table S2.** Cont.

| <b>Knee extension strength (kg)</b>     |             |                            |              |             |                       |              |                                         |
|-----------------------------------------|-------------|----------------------------|--------------|-------------|-----------------------|--------------|-----------------------------------------|
| <b>Study</b>                            | <b>Mean</b> | <b>Whey protein<br/>SD</b> | <b>Total</b> | <b>Mean</b> | <b>Control<br/>SD</b> | <b>Total</b> | <b>Std diff in<br/>means and 95% CI</b> |
| <b>With RT</b>                          |             |                            |              |             |                       |              |                                         |
| Weisgarber 2014 [35]                    | 5.5         | 13.44                      | 10           | 5.2         | 14.97                 | 10           | 0.0215 [-0.855, 0.898]                  |
| Nabuco 2018 [31]                        | 4           | 1                          | 21           | 4           | 0.53                  | 23           | 0 [-0.592, 0.592]                       |
| Mori 2018 [24]                          | 2.6         | 2.85                       | 25           | 1.1         | 1.625                 | 25           | 0.1465 [0.078, 0.215]                   |
| Kirk 2020 [23]                          | 106         | 78.8                       | 13           | 33          | 109                   | 12           | 0.773 [-0.04, 1.586]                    |
| <b>Without RT</b>                       |             |                            |              |             |                       |              |                                         |
| Kirk 2020 [23]                          | -17         | 91                         | 9            | -9          | 46.7                  | 18           | -0.1245 [-0.925, 0.676]                 |
| Zhu 2015 [34]                           | 2.08        | 5.37                       | 99           | 2.83        | 6.5                   | 94           | -0.1265 [-0.409, 0.156]                 |
| <b>Rising from sitting position (s)</b> |             |                            |              |             |                       |              |                                         |
| <b>Study</b>                            | <b>Mean</b> | <b>Whey protein<br/>SD</b> | <b>Total</b> | <b>Mean</b> | <b>Control<br/>SD</b> | <b>Total</b> | <b>Std diff in<br/>means and 95% CI</b> |
| <b>With RT</b>                          |             |                            |              |             |                       |              |                                         |
| Nabuco 2018 [31]                        | -1.2        | 1.61                       | 21           | -0.7        | 1.8                   | 23           | -0.292 [-0.887, 0.303]                  |
| <b>Without RT</b>                       |             |                            |              |             |                       |              |                                         |
| Zhu 2015 [23]                           | -0.14       | 1.29                       | 99           | -0.17       | 1.454                 | 94           | 0.022 [-0.260, 0.304]                   |

RT = resistance training; SD = standard deviation; Std diff = standard difference; CI = confidence interval

**Supplemental Table S3.** Differences in muscle mass between whey protein supplements and control supplements considering the subgroup analysis of RT/non-RT

| Upper limb lean mass (kg) |      |                    |       |      |               |       |                                 |
|---------------------------|------|--------------------|-------|------|---------------|-------|---------------------------------|
| Study                     | Mean | Whey protein<br>SD | Total | Mean | Control<br>SD | Total | Std diff in<br>means and 95% CI |
| <b>With RT</b>            |      |                    |       |      |               |       |                                 |
| Mori 2018 [24]            | 0    | 0.0242             | 25    | 0    | 0.0181        | 25    | 0 [-0.554, 0.554]               |
| Nabuco 2018 [31]          | 0.2  | 0.146              | 21    | 0.2  | 0.171         | 23    | 0 [-0.592, 0.592]               |
| <b>Without RT</b>         |      |                    |       |      |               |       |                                 |
| Zhu 2015 [34]             | 0.02 | 0.2                | 101   | 0.09 | 0.19          | 95    | 0.3585 [-0.641, -0.076]         |
| Lower limb lean mass (kg) |      |                    |       |      |               |       |                                 |
| Study                     | Mean | Whey protein<br>SD | Total | Mean | Control<br>SD | Total | Std diff in<br>means and 95% CI |
| <b>With RT</b>            |      |                    |       |      |               |       |                                 |
| Mori 2018 [24]            | 0.5  | 0.25               | 25    | 0.3  | 0.198         | 25    | 0.887 [0.306, 1.468]            |
| Nabuco 2018 [31]          | 0.4  | 0.238              | 21    | 0.1  | 0.2           | 23    | 1.3705 [0.713, 2.028]           |
| <b>Without RT</b>         |      |                    |       |      |               |       |                                 |
| Zhu 2015 [34]             | 0.02 | 0.2                | 101   | 0.09 | 0.19          | 95    | -0.3585 [-0.641, -0.076]        |

Supplemental Table S3. Cont.

| Skeletal muscle mass (kg) |      |                    |       |      |               |       |                                 |
|---------------------------|------|--------------------|-------|------|---------------|-------|---------------------------------|
| Study                     | Mean | Whey protein<br>SD | Total | Mean | Control<br>SD | Total | Std diff in<br>means and 95% CI |
| With RT                   |      |                    |       |      |               |       |                                 |
| Nabuco 2018 [31]          | 0.8  | 0.438              | 21    | 0.4  | 0.42          | 23    | 0.933 [0.31, 1.556]             |
| Kirk 2020 [23]            | 0.2  | 2.75               | 13    | 0.3  | 2.33          | 12    | -0.039 [-0.824, 0.746]          |
| Without RT                |      |                    |       |      |               |       |                                 |
| Kirk 2020 [23]            | -0.3 | 2.62               | 9     | 0.2  | 2.4           | 18    | -0.202 [-1.004, 0.600]          |

RT = resistance training; SD = standard deviation; Std diff = standard difference; CI = confidence interval

**Supplemental Table S4.** Differences in fat mass and body weight between whey protein supplements and control supplements considering the subgroup analysis of RT/non-RT

| Fat mass (kg)       |        |                    |       |       |               |       |                                 |
|---------------------|--------|--------------------|-------|-------|---------------|-------|---------------------------------|
| Study               | Mean   | Whey protein<br>SD | Total | Mean  | Control<br>SD | Total | Std diff in<br>means and 95% CI |
| <b>With RT</b>      |        |                    |       |       |               |       |                                 |
| Kirk 2020 [23]      | -0.2   | 10.35              | 13    | -0.5  | 16.81         | 12    | 0.0215 [-0.763, 0.806]          |
| Nabuco 2019 [27]    | -0.6   | 8.35               | 21    | -0.1  | 7.55          | 23    | -0.063 [-0.655, 0.529]          |
| Ashley 2021 [25]    | -0.319 | 7.17               | 28    | 0.76  | 7.375         | 39    | -0.148 [-0.634, 0.338]          |
| <b>Without RT</b>   |        |                    |       |       |               |       |                                 |
| Kirk 2020 [23]      | 1      | 9.4                | 9     | -0.2  | 12.21         | 18    | 0.1055 [-0.695, 0.906]          |
| Stojkovic 2017 [33] | -0.009 | 0.4                | 38    | 1.2   | 0.5           | 46    | -2.642 [-3.229, -2.055]         |
| Body weight (kg)    |        |                    |       |       |               |       |                                 |
| Study               | Mean   | Whey protein<br>SD | Total | Mean  | Control<br>SD | Total | Std diff in<br>means and 95% CI |
| <b>With RT</b>      |        |                    |       |       |               |       |                                 |
| Mori 2018 [24]      | 1.1    | 6.15               | 25    | 0.4   | 7.2           | 25    | 0.1045 [-0.450, 0.659]          |
| Ashley 2021 [25]    | -1.281 | 7.699              | 28    | -0.37 | 8.000         | 39    | -0.116 [-0.602, 0.370]          |
| <b>Without RT</b>   |        |                    |       |       |               |       |                                 |
| Zhu 2015 [34]       | 0.6    | 2.11               | 101   | 1.05  | 2.24          | 95    | -0.207 [-0.488, 0.074]          |
| Hodgson 2012 [36]   | 0      | 11.4               | 96    | 0.9   | 11.6          | 92    | -0.078 [-0.364, 0.208]          |

RT = resistance training; SD = standard deviation; Std diff = standard difference; CI = confidence interval

**Supplemental Table S5.** Differences in daily nutrients intake between whey protein supplements and control supplements considering the subgroup analysis of RT/non-RT

| Protein intake (g/day)      |       |                    |       |       |               |       |                                 |
|-----------------------------|-------|--------------------|-------|-------|---------------|-------|---------------------------------|
| Study                       | Mean  | Whey protein<br>SD | Total | Mean  | Control<br>SD | Total | Std diff in<br>means and 95% CI |
| <b>With RT</b>              |       |                    |       |       |               |       |                                 |
| Sugihara 2018 [30]          | 24.86 | 8.34               | 15    | 4.143 | 9.9           | 16    | 2.257 [1.356, 3.158]            |
| <b>Without RT</b>           |       |                    |       |       |               |       |                                 |
| Hodgson 2012 [36]           | -12   | 18.5               | 96    | -2    | 16.5          | 92    | -0.204 [-0.635, 0.227]          |
| Stojkovic 2017 [33]         | -5.1  | 17.88              | 38    | -1.7  | 15.6          | 46    | -0.5695 [-0.861, -0.278]        |
| Carbohydrate intake (g/day) |       |                    |       |       |               |       |                                 |
| Study                       | Mean  | Whey protein<br>SD | Total | Mean  | Control<br>SD | Total | Std diff in<br>means and 95% CI |
| <b>With RT</b>              |       |                    |       |       |               |       |                                 |
| Sugihara 2018 [30]          | -13.1 | 26.92              | 15    | -6.74 | 33.99         | 16    | -0.2065 [-0.913, 0.500]         |
| <b>Without RT</b>           |       |                    |       |       |               |       |                                 |
| Hodgson 2012 [36]           | -10   | 49.1               | 96    | -20   | 46.52         | 92    | 0.209 [-0.078, 0.496]           |
| Stojkovic 2017 [33]         | -8.6  | 51.78              | 38    | 1.6   | 50.87         | 46    | -0.199 [-0.630, 0.232]          |

**Supplemental Table S5.** Cont.

| <b>Fat intake (g/day)</b>          |             |                            |              |             |                       |              |                                         |
|------------------------------------|-------------|----------------------------|--------------|-------------|-----------------------|--------------|-----------------------------------------|
| <b>Study</b>                       | <b>Mean</b> | <b>Whey protein<br/>SD</b> | <b>Total</b> | <b>Mean</b> | <b>Control<br/>SD</b> | <b>Total</b> | <b>Std diff in<br/>means and 95% CI</b> |
| <b>With RT</b>                     |             |                            |              |             |                       |              |                                         |
| Sugihara 2018 [30]                 | 2.7143      | 8.8                        | 15           | 1.3         | 8.25                  | 16           | 0.166 [-0.540, 0.872]                   |
| <b>Without RT</b>                  |             |                            |              |             |                       |              |                                         |
| Hodgson 2012 [36]                  | -1          | 21.93                      | 96           | 3           | 21.65                 | 92           | -0.1835 [-0.470, 0.103]                 |
| Stojkovic 2017 [33]                | -4.4        | 19.73                      | 38           | -5.4        | 25.09                 | 46           | 0.044 [-0.386, 0.474]                   |
| <b>Total energy intake (g/day)</b> |             |                            |              |             |                       |              |                                         |
| <b>Study</b>                       | <b>Mean</b> | <b>Whey protein<br/>SD</b> | <b>Total</b> | <b>Mean</b> | <b>Control<br/>SD</b> | <b>Total</b> | <b>Std diff in<br/>means and 95% CI</b> |
| <b>With RT</b>                     |             |                            |              |             |                       |              |                                         |
| Sugihara 2018 [30]                 | 71.13       | 145.8                      | 15           | 1.54        | 178.4                 | 16           | 0.4255 [-0.287, 1.138]                  |
| <b>Without RT</b>                  |             |                            |              |             |                       |              |                                         |
| Hodgson 2012 [36]                  | -120.68     | 416                        | 96           | -68.17      | 380                   | 92           | -0.1015 [-0.531, 0.328]                 |
| Stojkovic 2017 [33]                | -70.4       | 329.8                      | 38           | -34.5       | 372.35                | 46           | -0.1315 [-0.418, 0.155]                 |

RT = resistance training; SD = standard deviation; Std diff = standard difference; CI = confidence interval



**Supplemental Figure S1.** Forest plot of the grip strength

Group 1.00: with resistance training; Group 2.00: without resistance training

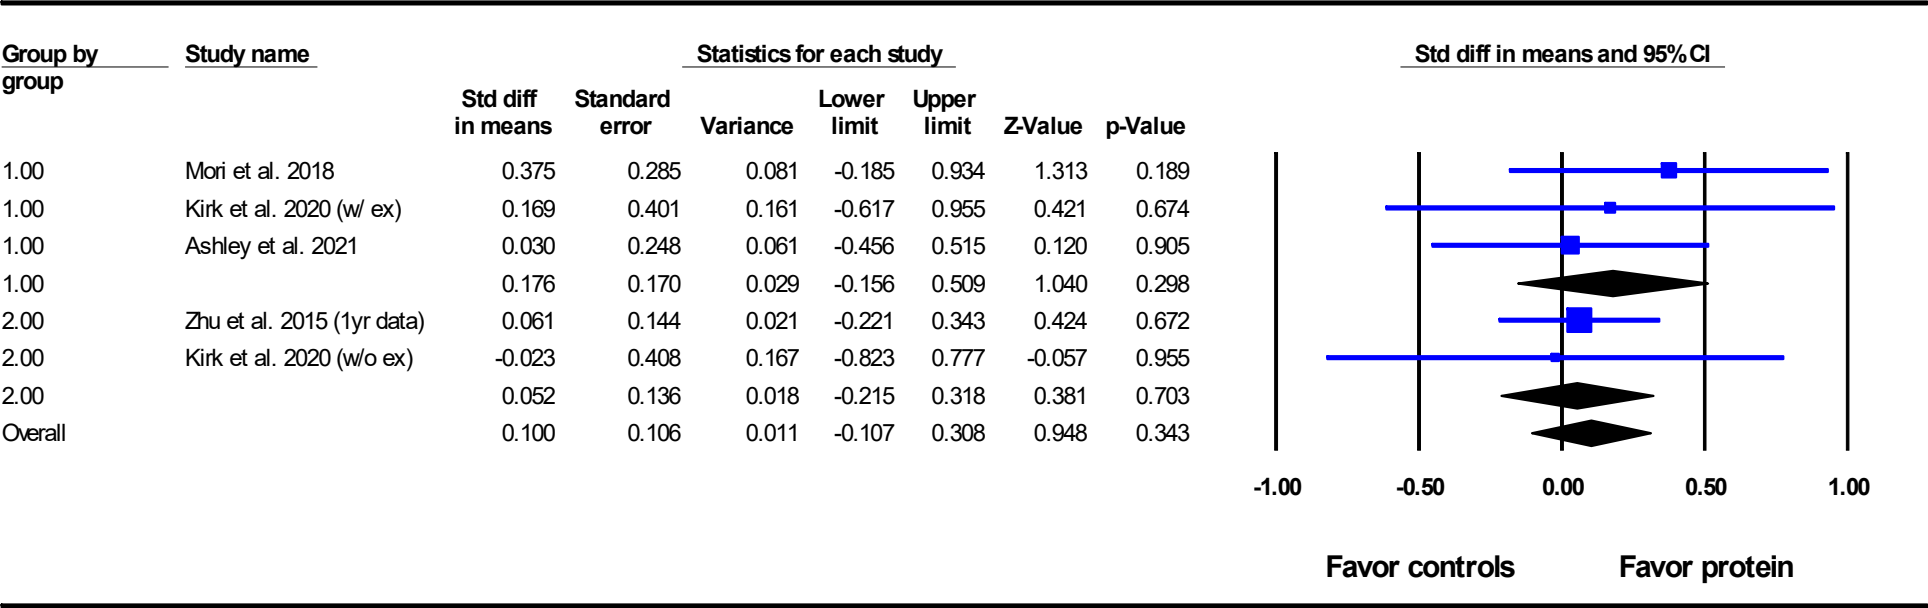

Supplemental Figure S2. Forest plot of the biceps curl strength

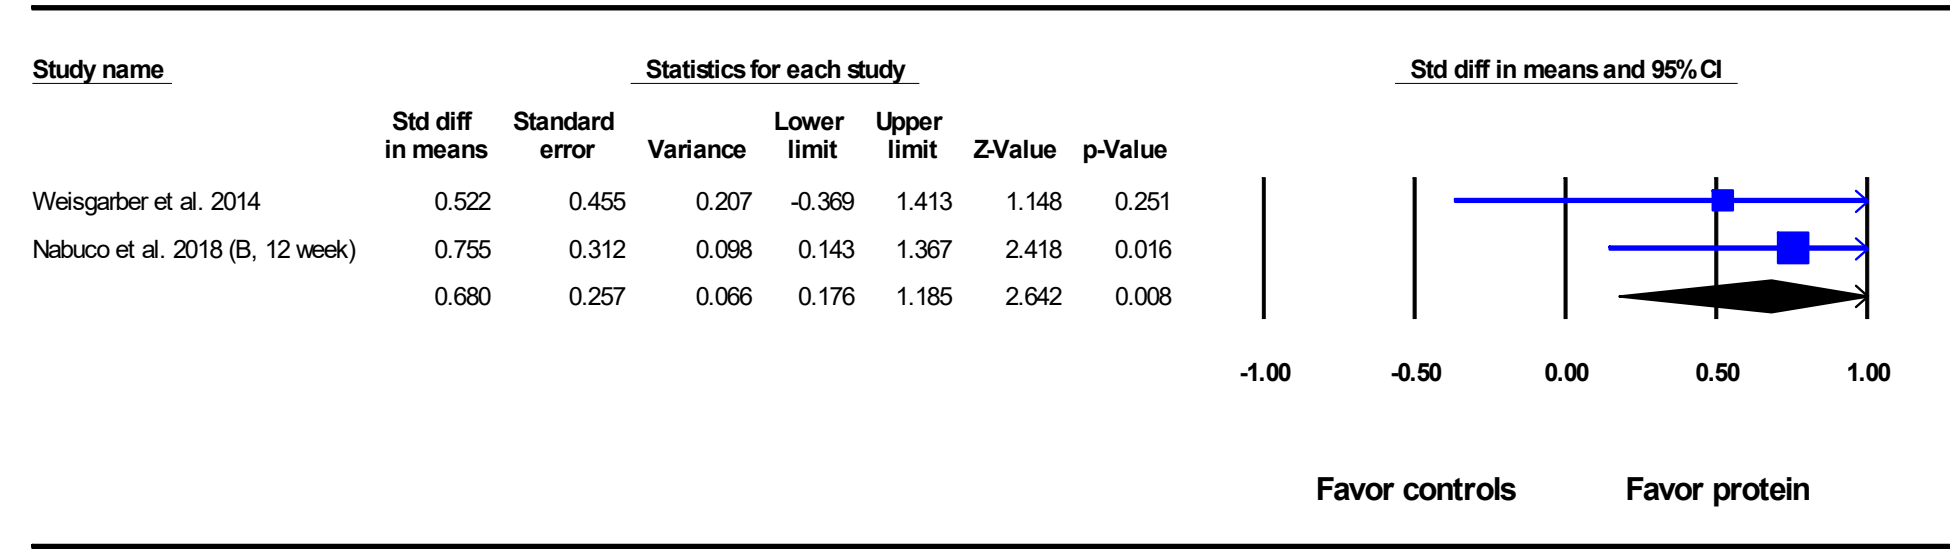

# Supplemental Figure S3. Forest plot of the knee extension strength

Group 1.00: with resistance training; Group 2.00: without resistance training

| Group by group | Study name                      | Statistics for each study |                |          |             |             | Std diff in means and 95%CI |         |
|----------------|---------------------------------|---------------------------|----------------|----------|-------------|-------------|-----------------------------|---------|
|                |                                 | Std diff in means         | Standard error | Variance | Lower limit | Upper limit | Z-Value                     | p-Value |
| 1.00           | Weisgarber et al. 2014          | 0.021                     | 0.447          | 0.200    | -0.855      | 0.898       | 0.047                       | 0.962   |
| 1.00           | Mori et al. 2018                | 0.647                     | 0.290          | 0.084    | 0.078       | 1.215       | 2.229                       | 0.026   |
| 1.00           | Nabuco et al. 2018 (B, 12 week) | 0.000                     | 0.302          | 0.091    | -0.592      | 0.592       | 0.000                       | 1.000   |
| 1.00           | Kirk et al. 2020 (w/ ex)        | 0.773                     | 0.415          | 0.172    | -0.040      | 1.586       | 1.862                       | 0.063   |
| 1.00           |                                 | 0.364                     | 0.202          | 0.041    | -0.031      | 0.759       | 1.804                       | 0.071   |
| 2.00           | Zhu et al. 2015 (1yr data)      | -0.126                    | 0.144          | 0.021    | -0.409      | 0.156       | -0.875                      | 0.382   |
| 2.00           | Kirk et al. 2020 (w/o ex)       | -0.124                    | 0.409          | 0.167    | -0.925      | 0.676       | -0.305                      | 0.761   |
| 2.00           |                                 | -0.126                    | 0.136          | 0.018    | -0.392      | 0.141       | -0.926                      | 0.354   |
| Overall        |                                 | 0.027                     | 0.113          | 0.013    | -0.194      | 0.248       | 0.240                       | 0.810   |

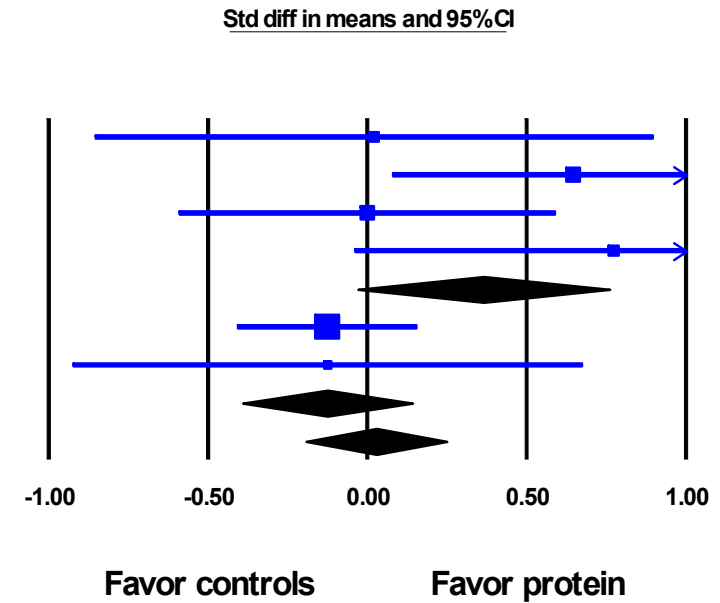

**Supplemental Figure S4.** Forest plot of the knee flexion strength  
 Group 1.00: with resistance training; Group 2.00: without resistance training

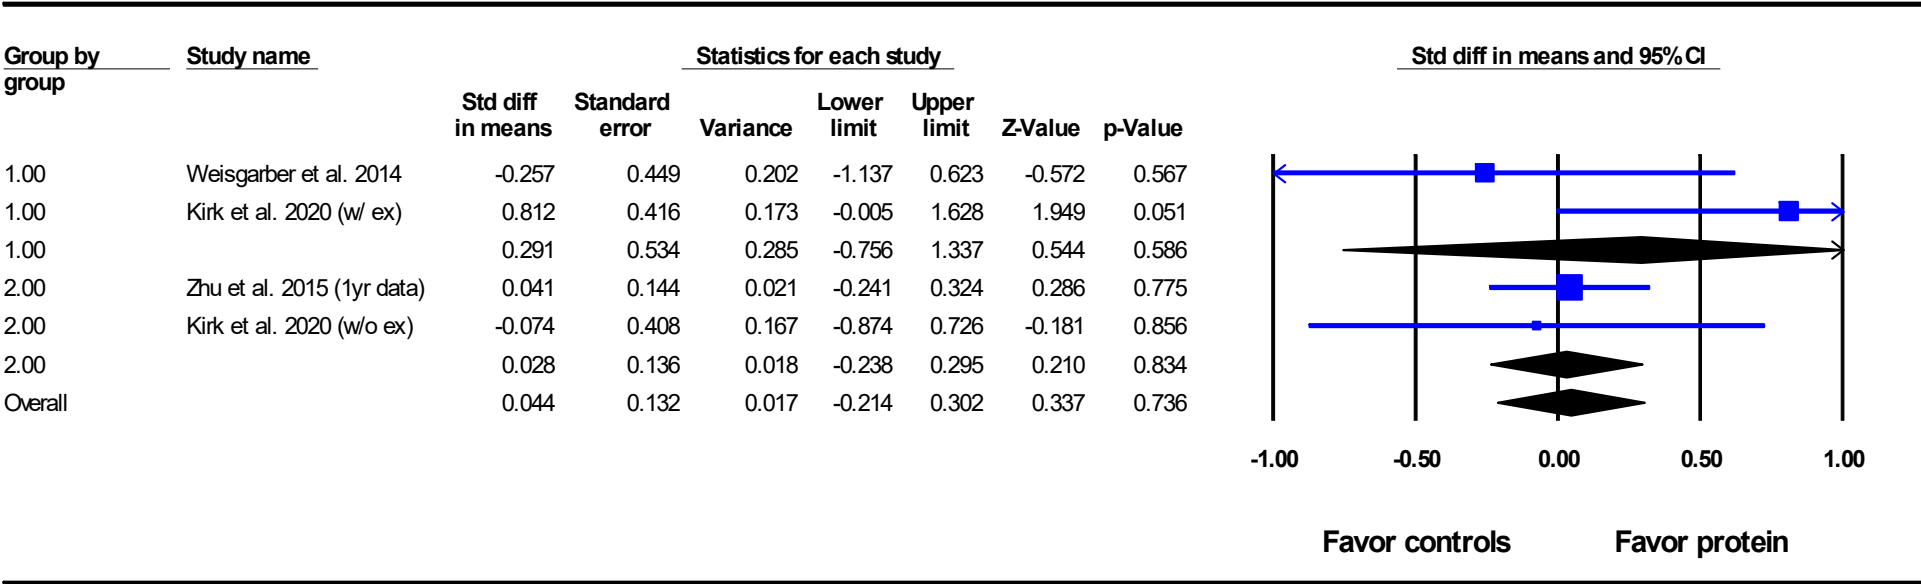

Supplemental Figure S5. Forest plot of the gait speed

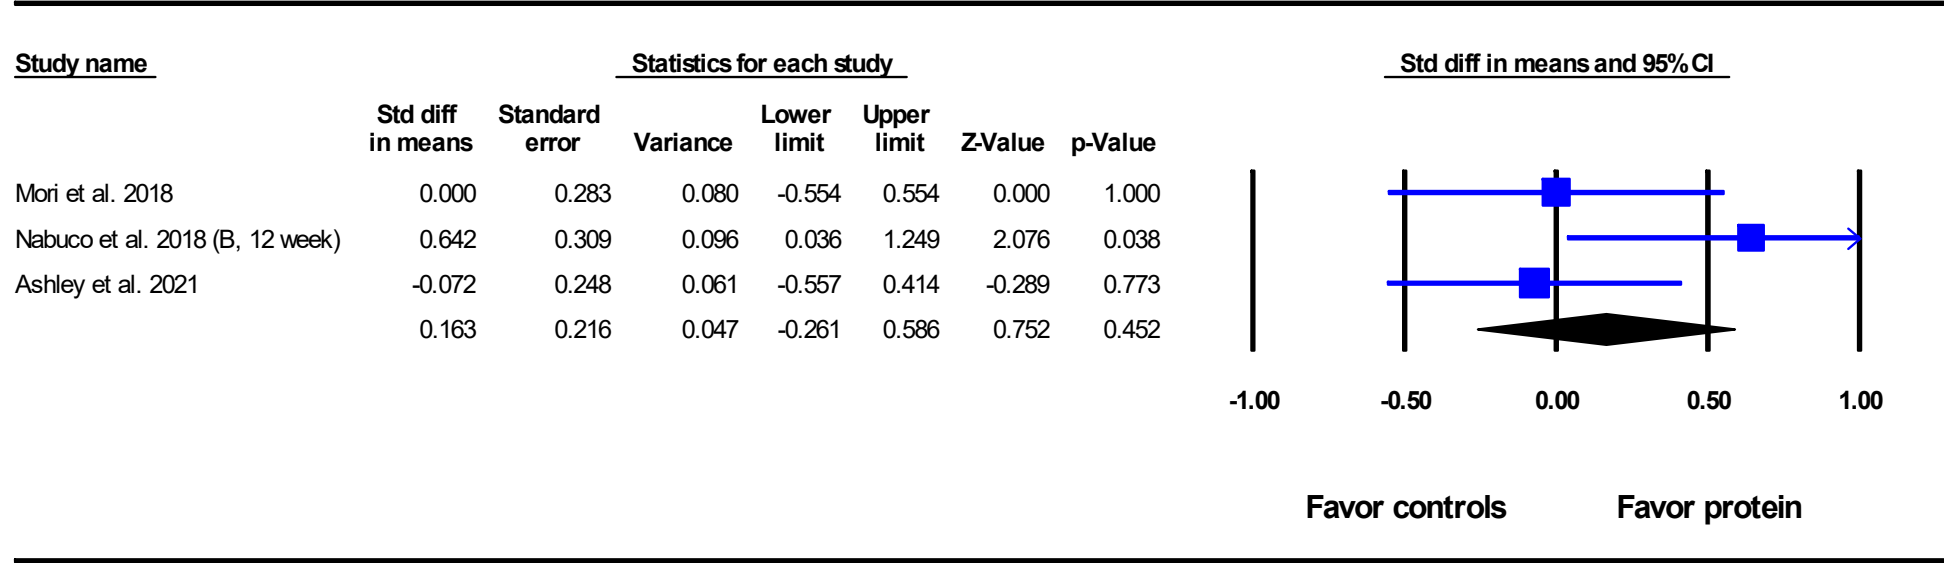

Supplemental Figure S6. Forest plot of the chest press

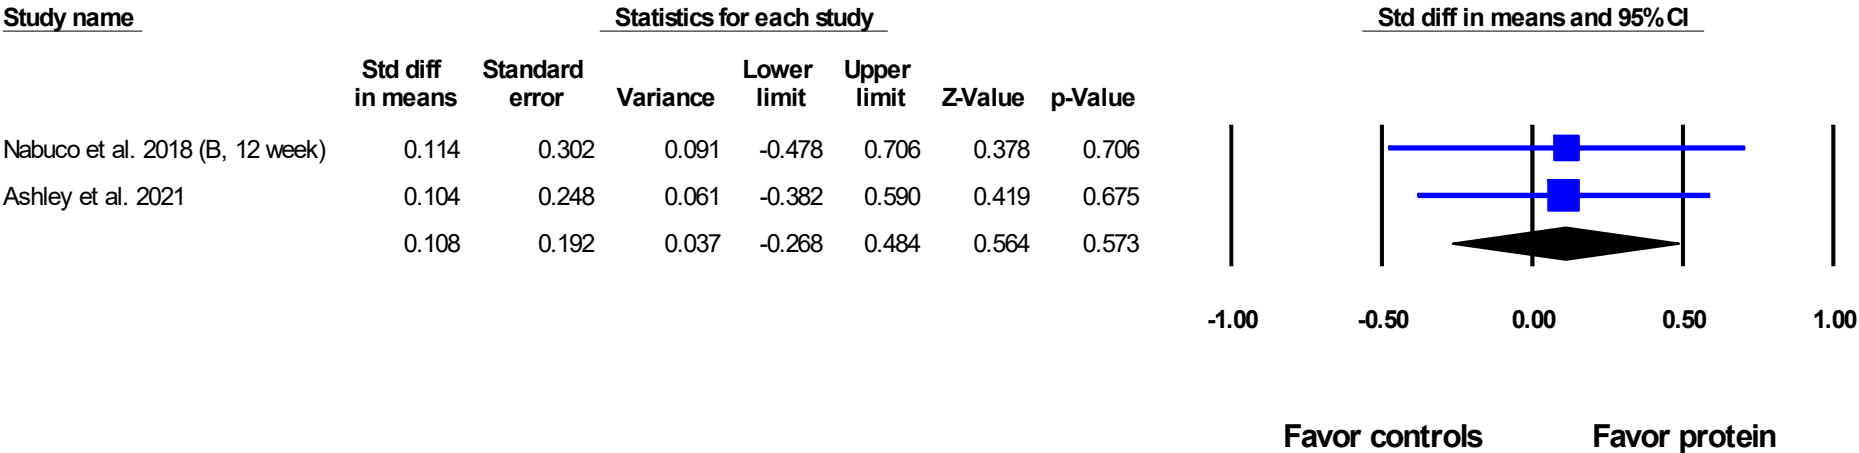

**Supplemental Figure S7.** Forest plot of the rising from sitting position  
Group 1.00: with resistance training; Group 2.00: without resistance training

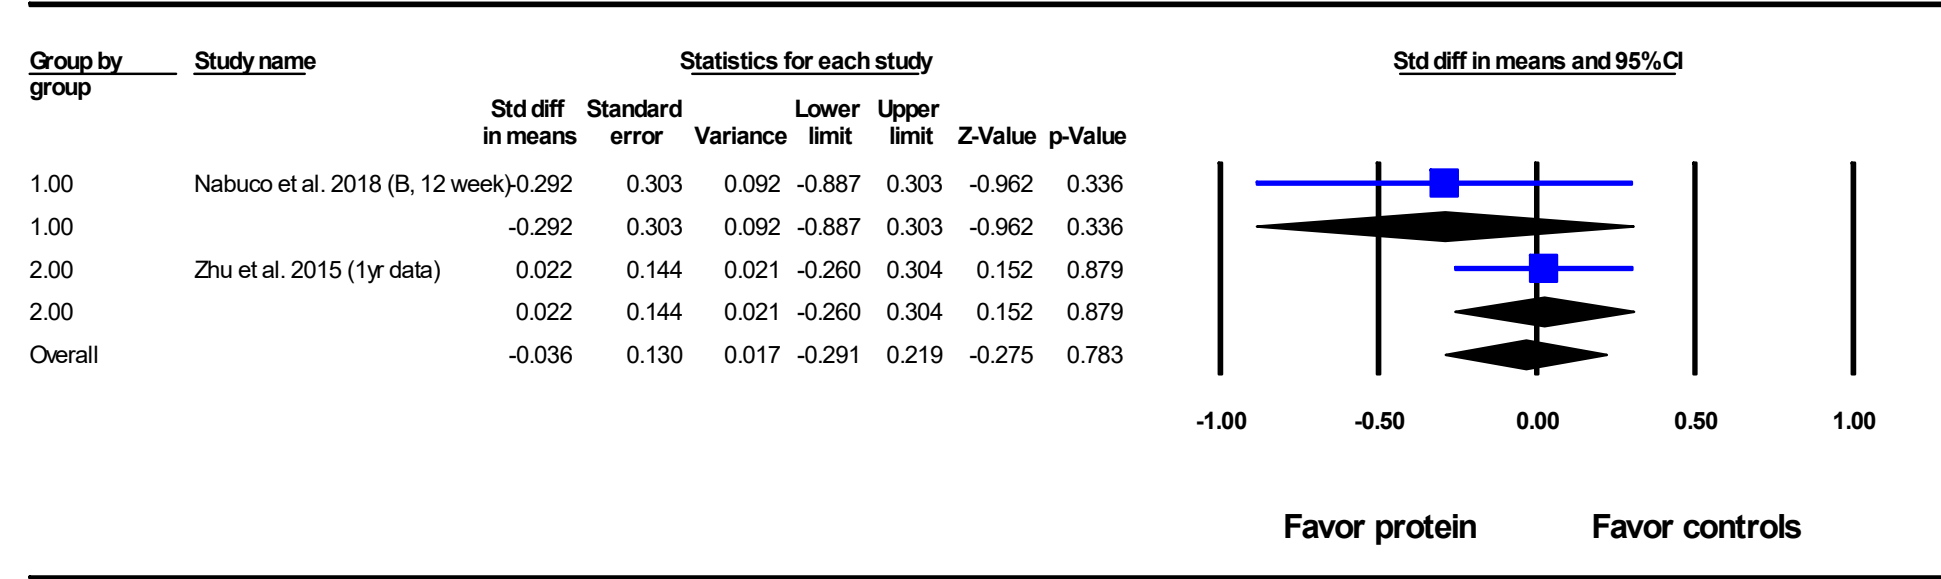

**Supplemental Figure S8.** Forest plot of the upper limb lean mass  
Group 1.00: with resistance training; Group 2.00: without resistance training

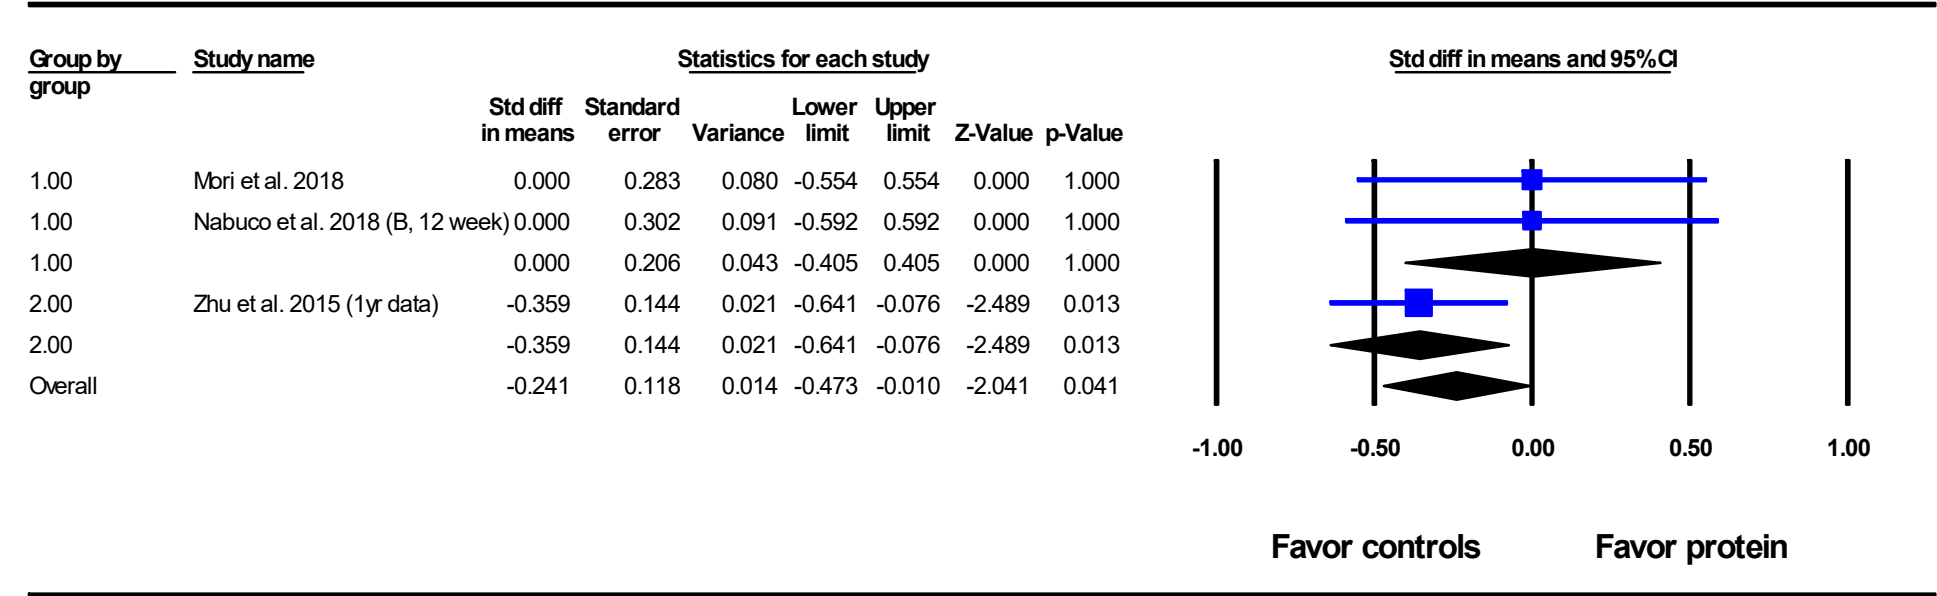



**Supplemental Figure S9.** Forest plot of the lower limb lean mass  
Group 1.00: with resistance training; Group 2.00: without resistance training

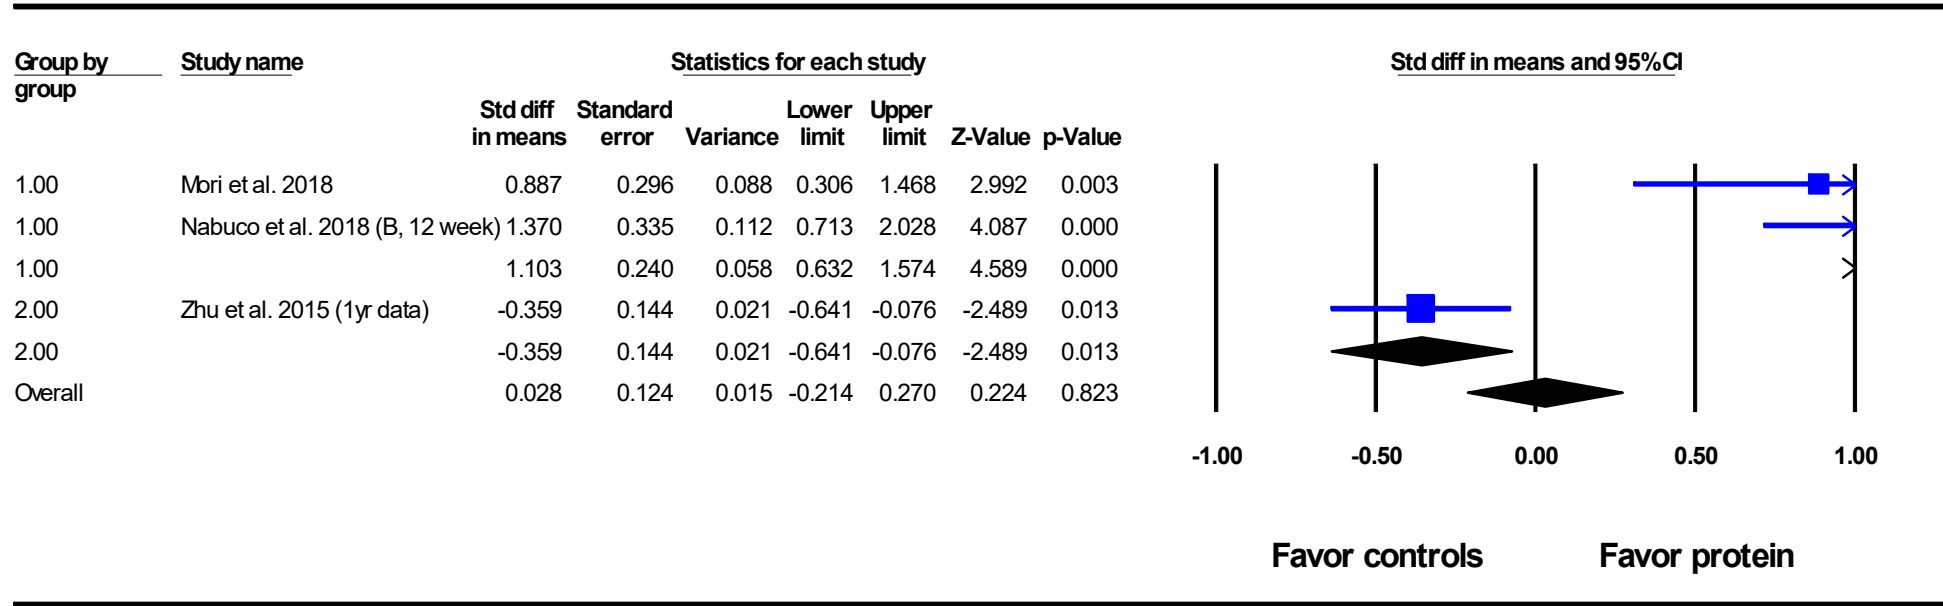

**Supplemental Figure S10.** Forest plot of the skeletal muscle mass  
 Group 1.00: with resistance training; Group 2.00: without resistance training

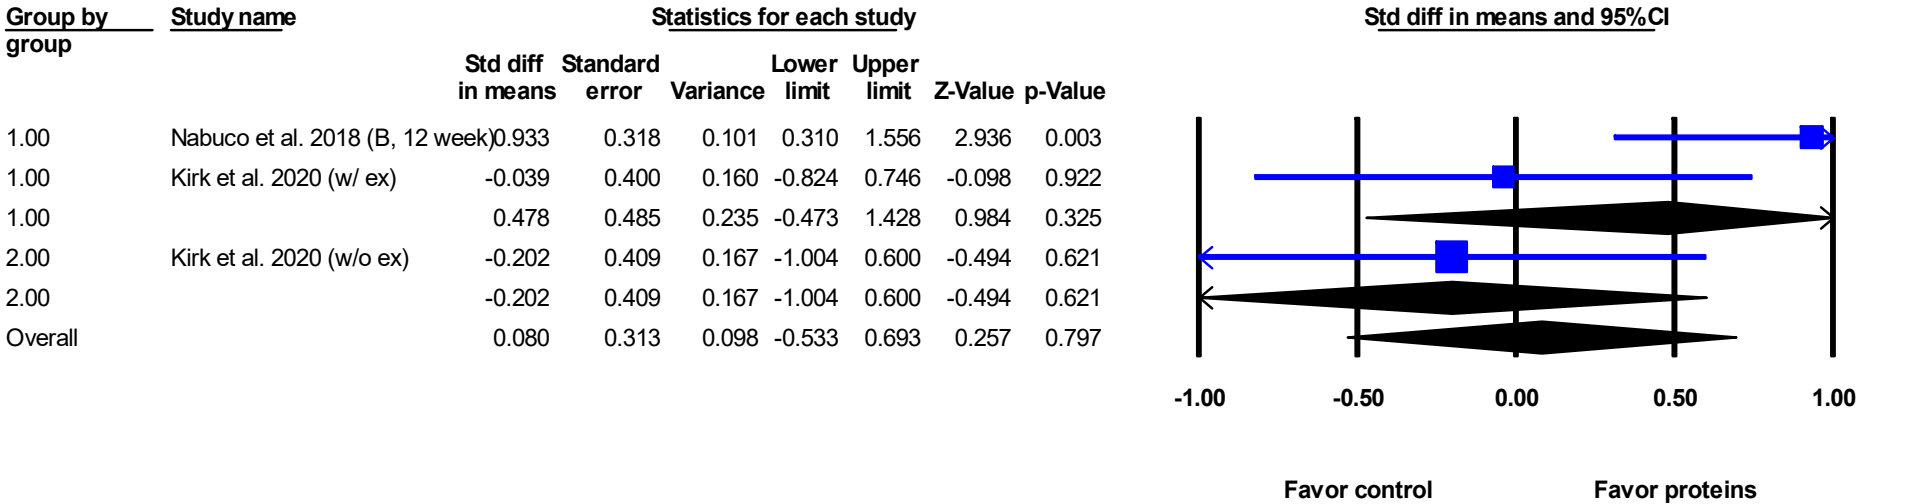

# Supplemental Figure S11. Forest plot of the fat mass

Group 1.00: with resistance training; Group 2.00: without resistance training

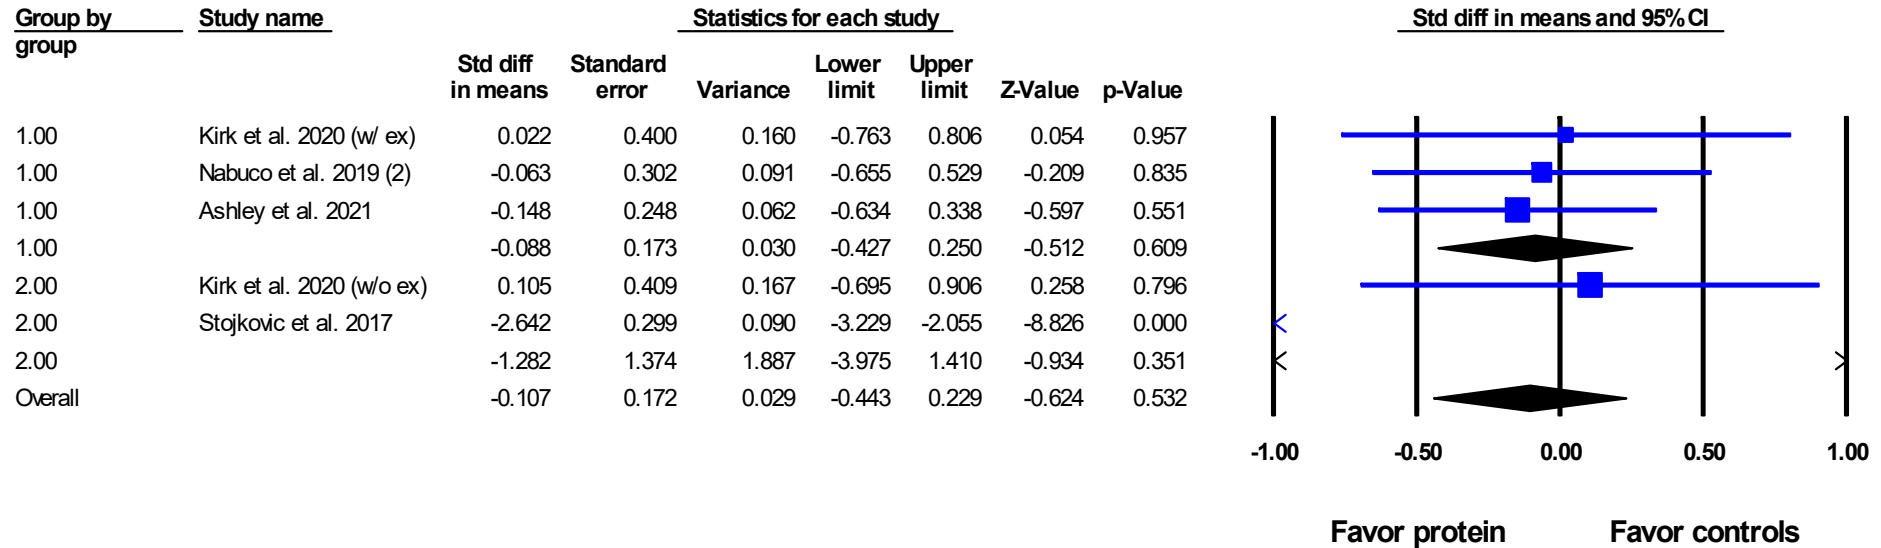

**Supplemental Figure S12.** Forest plot of the body weight  
Group 1.00: with resistance training; Group 2.00: without resistance training

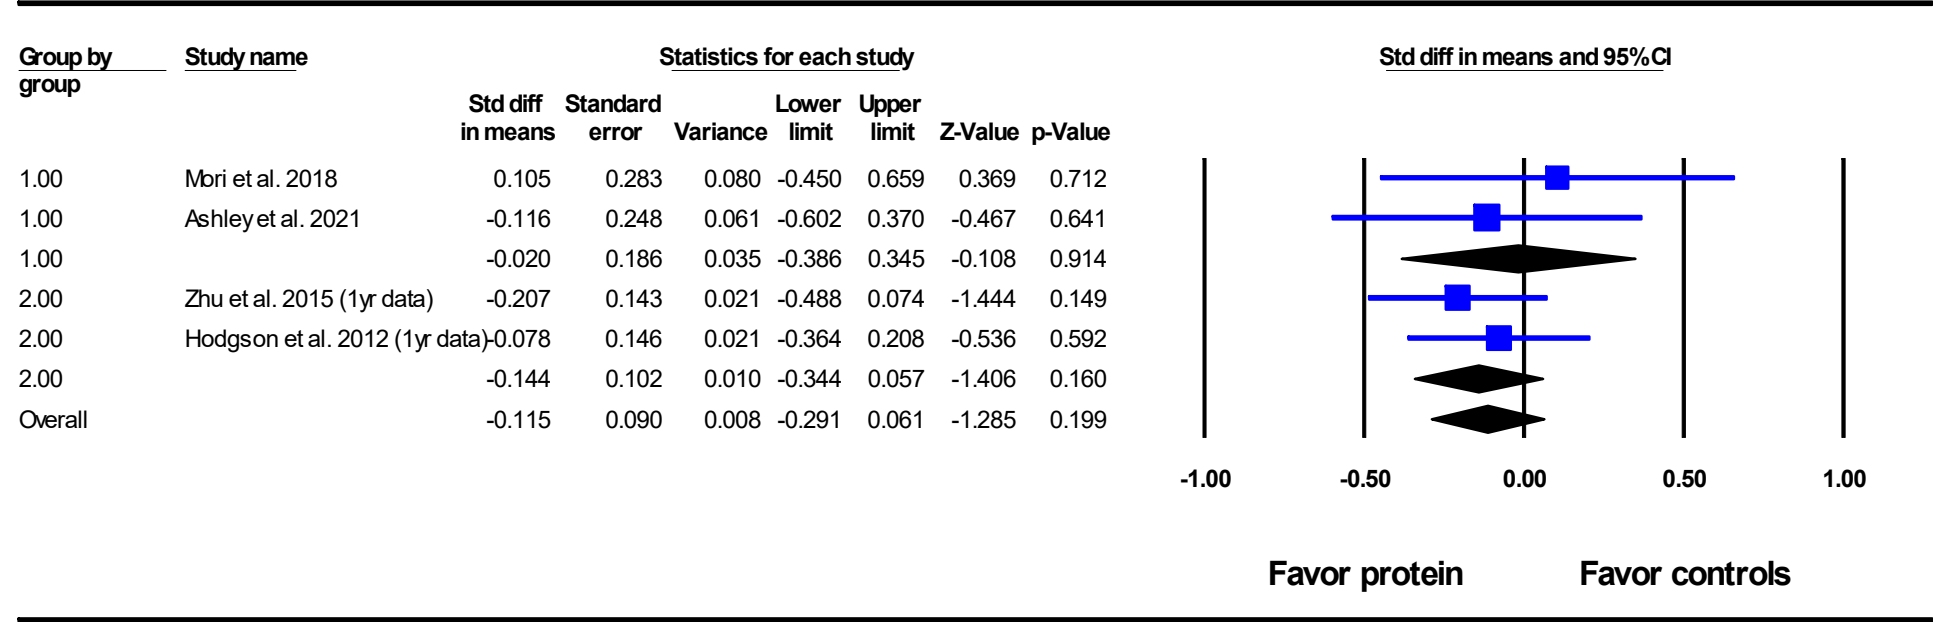

**Supplemental Figure S13.** Forest plot of the total energy intake  
Group 1.00: with resistance training; Group 2.00: without resistance training

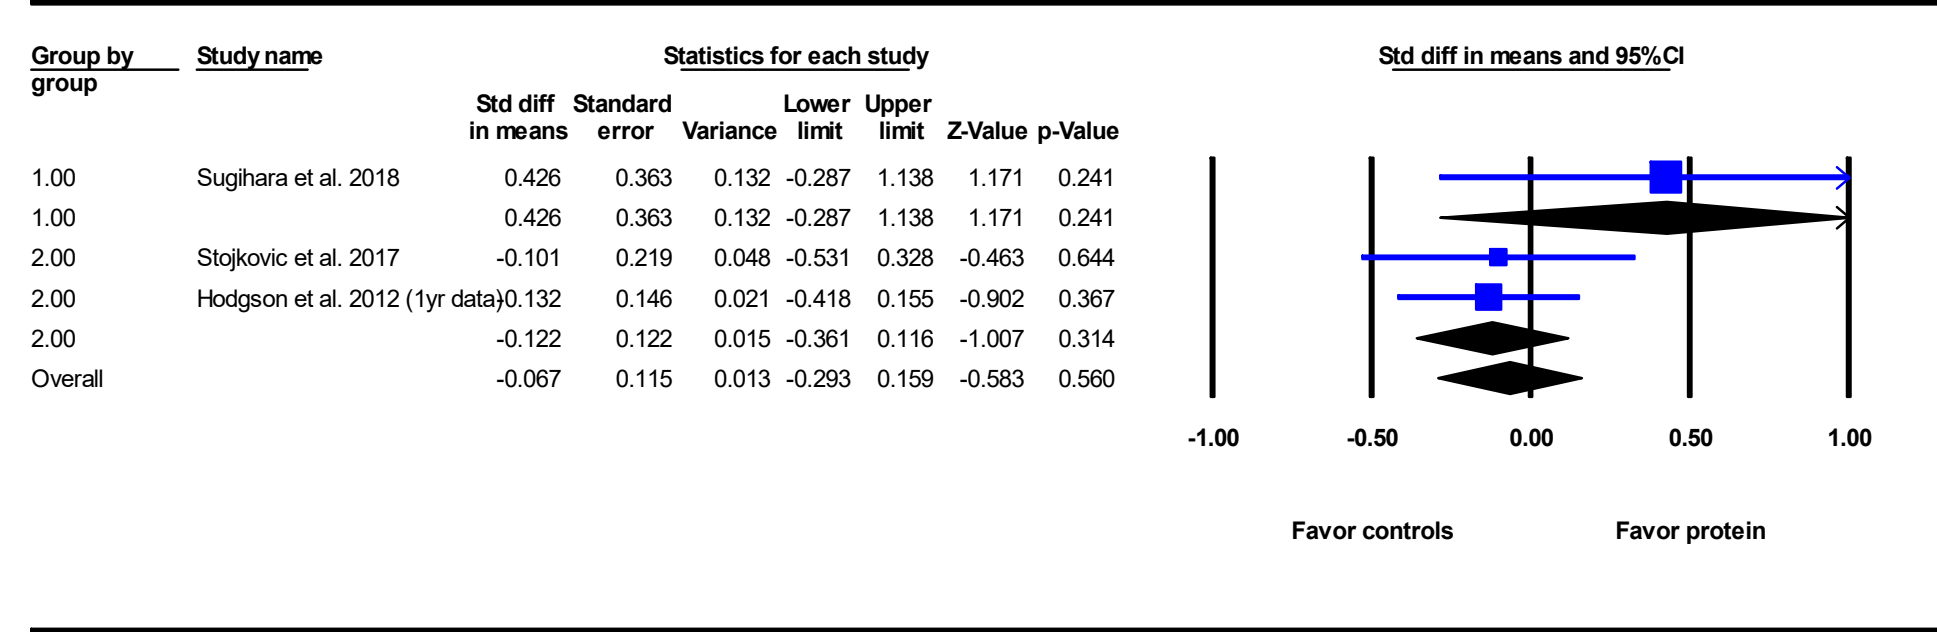

**Supplemental Figure S14.** Forest plot of the carbohydrate intake  
Group 1.00: with resistance training; Group 2.00: without resistance training

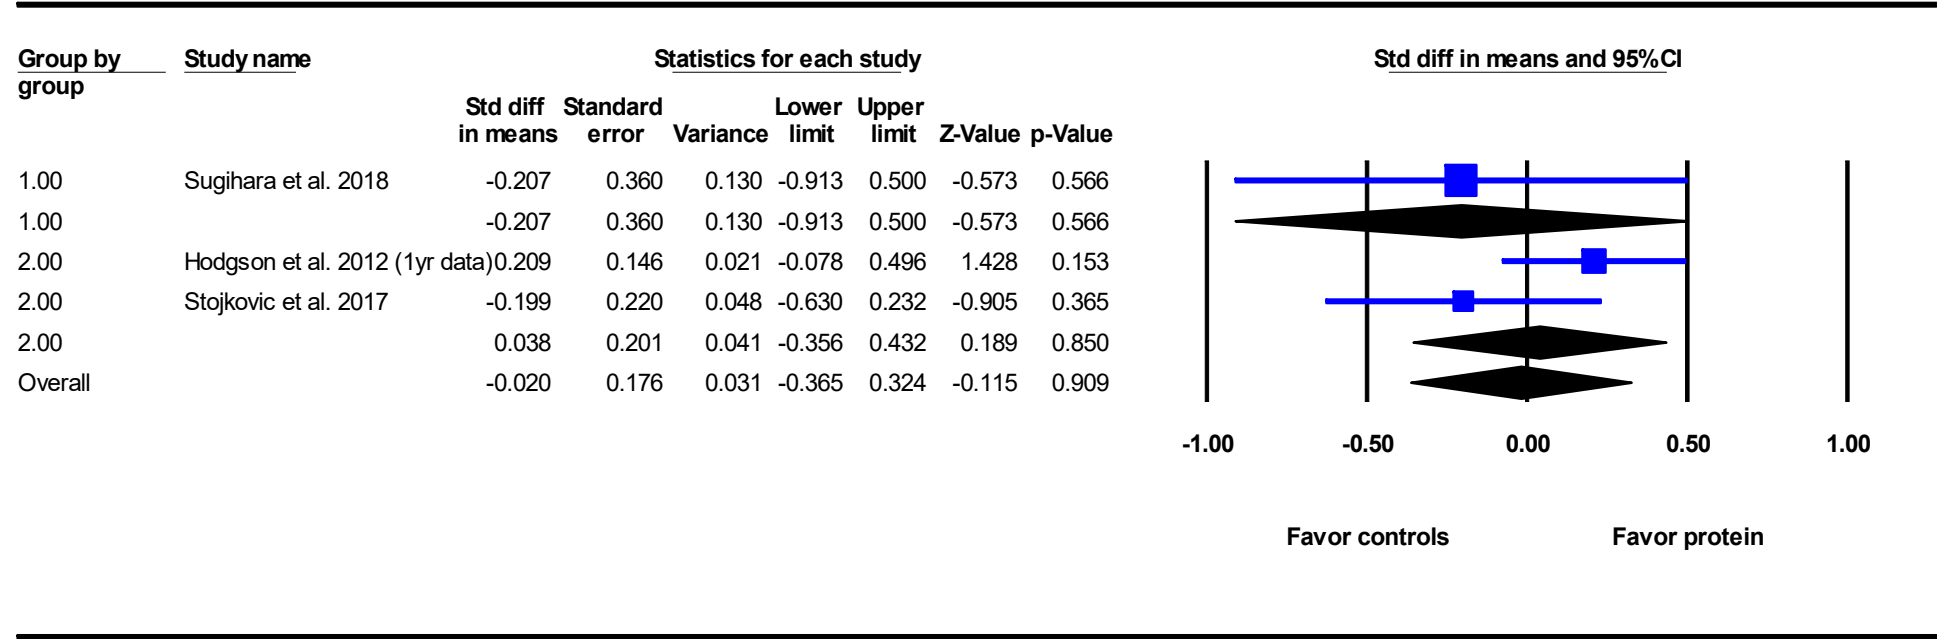

**Supplemental Figure S15.** Forest plot of the fat intake  
Group 1.00: with resistance training; Group 2.00: without resistance training

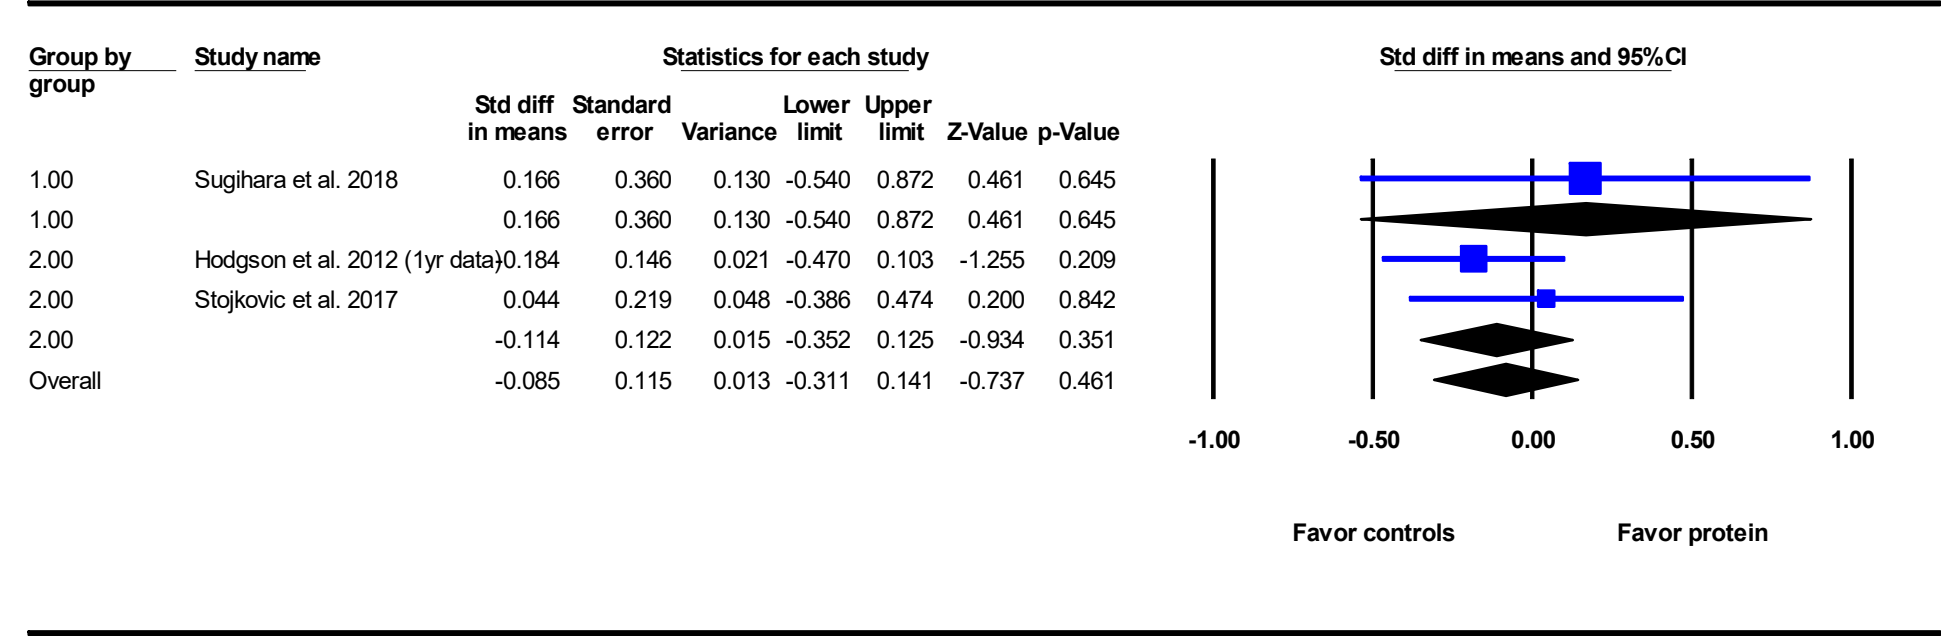

**Supplemental Figure S16.** Forest plot of the protein intake  
 Group 1.00: with resistance training; Group 2.00: without resistance training

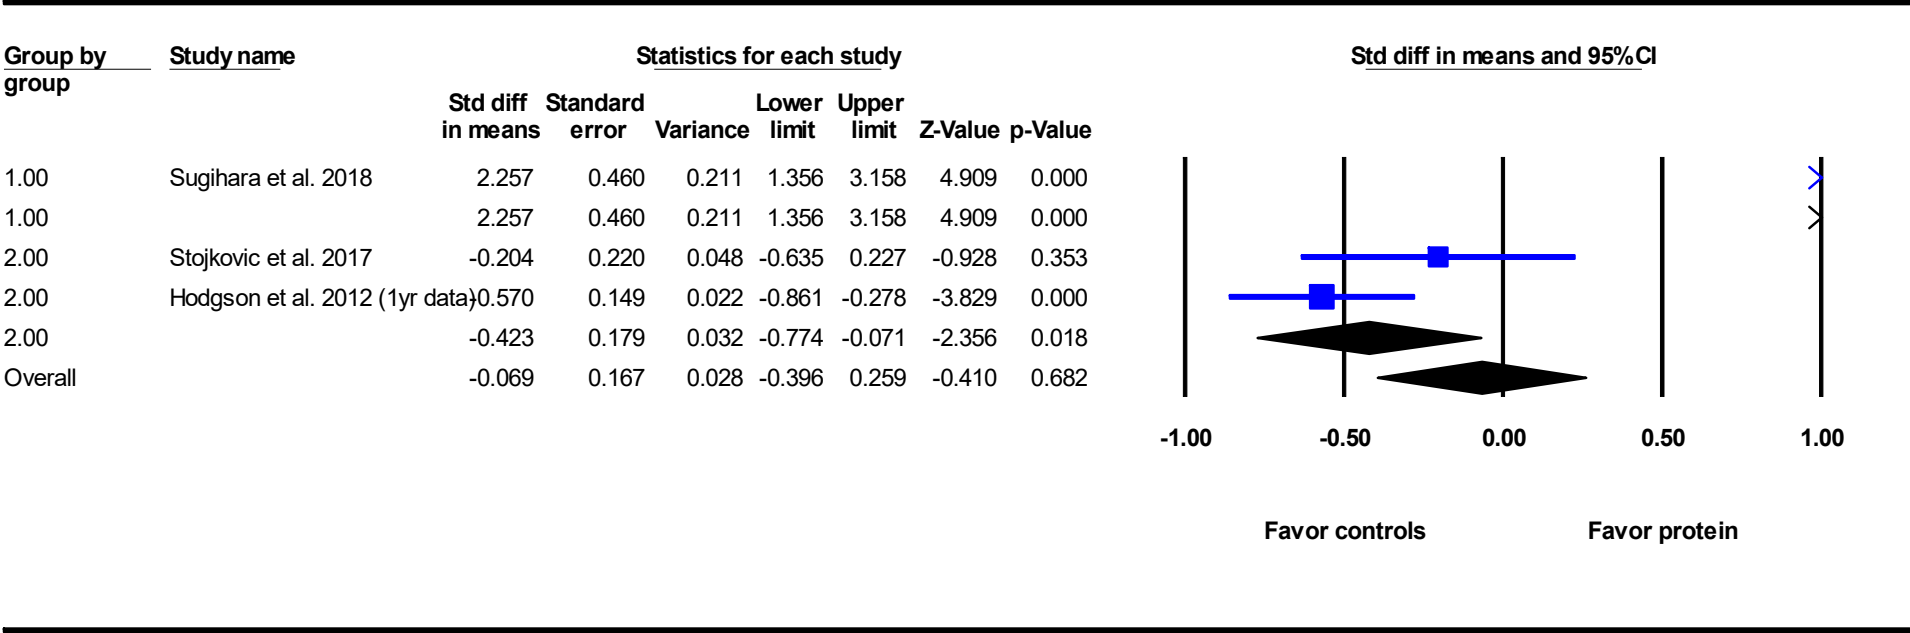

Supplement: s1 [file s1]
